# Supplementary material for: Kinetics of thermo-induced micelle-to-vesicle transitions in a catanionic surfactant system investigated by stopped-flow temperature jump
Source: Royal Society of Chemistry journal article supplement (doi:10.1039/c0cp02856h), 2011-01-01
Supplement: c0cp02856h.pdf [file c0cp02856h.pdf]

## Supplementary Information

### **Kinetics of Thermo-Induced Micelle-to-Vesicle Transitions in Catanionic Surfactant System Investigated by Stopped-Flow Temperature Jump**

**Jingyan Zhang<sup>†,‡</sup> and Shiyong Liu<sup>\*,‡</sup>**

*School of Materials and Chemical Engineering, Anhui Key Laboratory of Advanced  
Building Materials, Anhui University of Architecture, Hefei, Anhui 230022, China;  
CAS Key Laboratory of Soft Matter Chemistry, Department of Polymer Science and  
Engineering, University of Science and Technology of China, Hefei, Anhui 230026, China*

<sup>†</sup> Anhui University of Architecture

<sup>‡</sup> University of Science and Technology of China

\* To whom correspondence should be addressed. E-mail: sliu@ustc.edu.cn

**Table S1. Summary of the Data Calculated from Single- and Double-Exponential Fitting to the Kinetic Traces Shown in Figure 8.**

|                           |                       |                       |                         |                         |                         |          |
|---------------------------|-----------------------|-----------------------|-------------------------|-------------------------|-------------------------|----------|
| <i>Single-Exponential</i> | /                     | <i>c</i>              | /                       | /                       | $\tau$ / s              | $\chi^2$ |
| <i>Fitting</i>            | /                     | 1                     | /                       | /                       | 136                     | 17.6     |
| <i>Double-Exponential</i> | <i>c</i> <sub>1</sub> | <i>c</i> <sub>2</sub> | $\tau$ <sub>1</sub> / s | $\tau$ <sub>2</sub> / s | $\tau$ <sub>f</sub> / s | $\chi^2$ |
| <i>Fitting</i>            | 0.42                  | 0.58                  | 5.2                     | 188                     | 73                      | 0.61     |

$\tau_i$ : characteristic relaxation time.  $c_i$ : amplitudes associated with  $\tau_i$ . The accuracy of the obtained  $\tau_i$  and  $c_i$  values was within  $\pm 5\%$ .

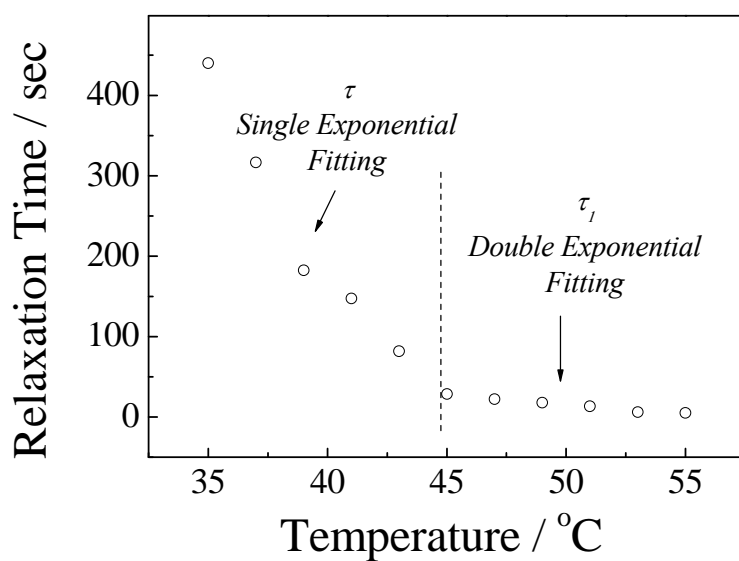

**Figure S1.** Final temperature dependence of relaxation times  $\tau$  and  $\tau_1$  obtained respectively from the single exponential fitting of stopped-flow dynamic traces shown in Figure 4a and double exponential fitting results of stopped-flow dynamic traces shown in Figure 6.
